# Supplementary material for: Diet–Microbiome Relationships in Prostate-Cancer Survivors with Prior Androgen Deprivation-Therapy Exposure and Previous Exercise Intervention Enrollment
Source: MDPI journal article supplement (doi:10.3390/microorganisms14010251), 2026-01-21
Supplement: s1 [file microorganisms-4081766-supplementary.pdf › microorganisms-4081766-supplementary.pdf]

Suppl. Table S1. Details for *APOE* genotyping

| Sample ID                 | Pate Barcode | Gene Symbol | NCBI SNP Reference | Assay ID      | Allele 1 Call | Allele 2 Call | Genotype |
|---------------------------|--------------|-------------|--------------------|---------------|---------------|---------------|----------|
| APOE 1018 (e3/e3)         | CFK0KY7H     | APOE        | rs429358           | C__3084793_20 | T             | T             | TT       |
| APOE 1046 (e4/e4)         | CFK0KY7H     | APOE        | rs429358           | C__3084793_20 | C             | C             | CC       |
| APOE 1055 (e4/e3)         | CFK0KY7H     | APOE        | rs429358           | C__3084793_20 | C             | T             | CT       |
| APOE IID# 29_OS35 (e2/e3) | CFK0KY7H     | APOE        | rs429358           | C__3084793_20 | T             | T             | TT       |
| APOE 1018 (e3/e3)         | CFK0KY71     | APOE        | rs7412             | C__904973_10  | C             | C             | CC       |
| APOE 1046 (e4/e4)         | CFK0KY71     | APOE        | rs7412             | C__904973_10  | C             | C             | CC       |
| APOE 1055 (e4/e3)         | CFK0KY71     | APOE        | rs7412             | C__904973_10  | C             | C             | CC       |
| APOE IID# 29_OS35 (e2/e3) | CFK0KY71     | APOE        | rs7412             | C__904973_10  | C             | T             | CT       |
